# Supplementary material for: Camelid Single-Domain Antibodies (VHHs) against Crotoxin: A Basis for Developing Modular Building Blocks for the Enhancement of Treatment or Diagnosis of Crotalic Envenoming
Source: PubMed Central journal article supplement (PMC5923308; doi:10.3390/toxins10040142), 2018-03-29
Supplement: toxins-10-00142-s001.pdf [file toxins-10-00142-s001.pdf]

# Supplementary Materials: Camelid Single-Domain Antibodies (VHHs) against Crotoxin: A Basis for Developing Modular Building Blocks for the Enhancement of Treatment or Diagnosis of Crotalic Envenoming

Marcos B. Luiz <sup>1,2</sup>, Soraya S. Pereira <sup>1</sup>, Nidiane D. R. Prado <sup>1</sup>, Naan R. Gonçalves <sup>1</sup>, Anderson M. Kayano <sup>1</sup>, Leandro S. Moreira-Dill <sup>1</sup>, Juliana C. Sobrinho <sup>1</sup>, Fernando B. Zanchi <sup>1</sup>, André L. Fuly <sup>3</sup>, Cleber F. Fernandes <sup>4</sup>, Juliana P. Zuliani <sup>1,5</sup>, Andreimar M. Soares <sup>1,6,\*</sup>, Rodrigo G. Stabeli <sup>7,8</sup> and Carla F. C. Fernandes <sup>1,\*</sup>

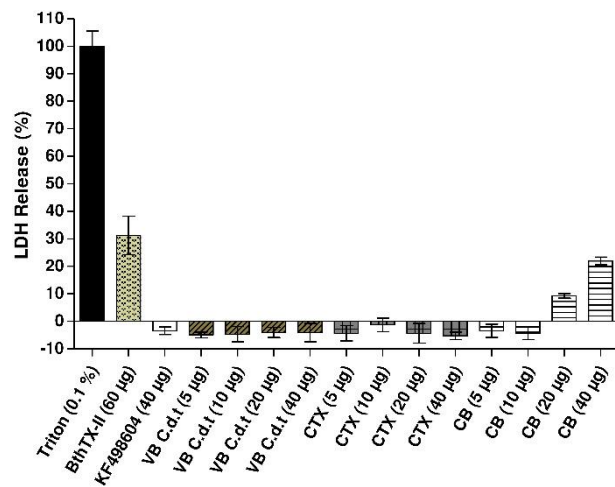

**Figure S1.** Cytotoxic activity evaluation of *Crotalus d. terrificus* venom, CTX and CB in murine C2C12 skeletal muscle myoblasts.

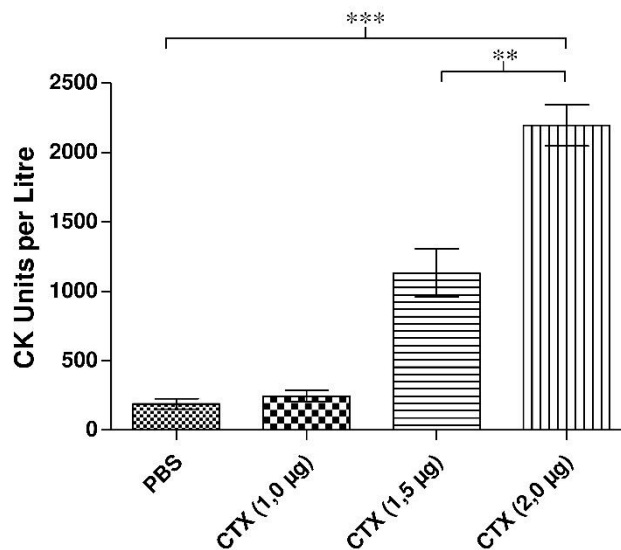

**Figure S2.** Determination of CTX myotoxic activity in mice.

**Table S1.** Interaction analysis by SPR.

| Immobilized antigen | VHH      | $k_{on}$ [1/Ms]        | $k_{off}$ [1/s] | $R_{max}$ [RU] | $K_D$ [M]              | $\chi^2$ [RU] |
|---------------------|----------|------------------------|-----------------|----------------|------------------------|---------------|
| CTX                 | KF498602 | $2.148 \times 10^{+4}$ | 0.03673         | 67.93          | $1.710 \times 10^{-6}$ | 0.764         |
|                     | KF498204 | $6.807 \times 10^{+4}$ | 0.005537        | 47.18          | $8.134 \times 10^{-8}$ | 1.10          |

Binding kinetics parameters were measured according to SPR sensorgrams shown in Figure 3 using the 1:1 Langmuir model

**Table S2.** In silico studies' data

| Target (VHH clone) | Template (PDB:chain) | % Identity | Resolution (Å) | RMSD (Å) | Reference Template |
|--------------------|----------------------|------------|----------------|----------|--------------------|
| KF498602           | 1xfp:A               | 64         | 1.50           | 1.95     | [1]                |
| KF498603           | 1xfp:A               | 64         | 1.50           | 0.21     | [1]                |
| KF498604           | 1kxt:B               | 66         | 2.00           | 0.36     | [2]                |
| KF498605           | 2vxs:K               | 76         | 2.63           | 0.29     | [3]                |
| KF498606           | 4b41:A               | 78         | 1.19           | 0.27     | [4]                |

**Table S3.** Llama immunization schedule with CTX and CA and CB subunits.

| Day | Immunization number | Toxin dose |        |        | Adjuvant                | Serum collection |
|-----|---------------------|------------|--------|--------|-------------------------|------------------|
|     |                     | CTX        | CA     | CB     |                         |                  |
| -7  | -                   | -          | -      | -      | -                       | Yes              |
| 0   | 1                   | 100 µg     | 50 µg  | 50 µg  | -                       | Yes              |
| 7   | 2                   | 100 µg     | 50 µg  | 50 µg  | 50 µL CFA <sup>a</sup>  | Yes              |
| 14  | 3                   | 200 µg     | 100 µg | 100 µg | 100 µL IFA <sup>b</sup> | Yes              |
| 21  | 4                   | 200 µg     | 100 µg | 100 µg | 100 µL IFA              | Yes              |
| 28  | 5                   | 200 µg     | 100 µg | 100 µg | 100 µL IFA              | Yes              |
| 31  | -                   | -          | -      | -      | -                       | Yes              |

<sup>a</sup>CFA: Complete Freund's adjuvant; <sup>b</sup>IFA: Incomplete Freund's adjuvant; The llama was immunized with CTX, CA and CB subunits by subcutaneous route. Blood was collected from the jugular vein three days after final boost.

## References

- De Genst, E.; Handelberg, F.; Van Meirhaeghe, A.; Vynck, S.; Loris, R.; Wyns, L.; Muyldermans, S. Chemical basis for the affinity maturation of a Camel Single Domain Antibody. *J. Biol. Chem.* **2004**, *279*, 53593–53601.
- Desmyter, A.; Spinelli, S.; Payan, F.; Lauwereys, M.; Wyns, L.; Muyldermans, S.; Cambillau, C. Three camelid VHH domains in complex with porcine pancreatic alpha-amylase. Inhibition and versatility of binding topology. *J. Biol. Chem.* **2002**, *277*, 23645–23650.
- Gerhardt, S.; Abbott, W.M.; Hargreaves, D.; Pauptit, R.A.; Davies, R.A.; Needham, M.R.; Langham, C.; Barker, W.; Aziz, A.; Snow, M.J.; et al. Structure of IL-17A in complex with a potent, fully human neutralising antibody. *J. Mol. Biol.* **2009**, *394*, 905–921.
- Beringer, D.X.; Dorresteyn, B.; Rutten, L.; Wienk, H.; El Khattabi, M.; Kroon-Batenburg, L.M.J.; Verrips, C.T. Crystal structure of an amyloid-beta binding Single Chain Antibody G7 Protein Data Bank. *Code 4b41* 2012. Available online: <https://www.rcsb.org/pdb/explore.do?structureId=4B41> (accessed on 15 December 2017).

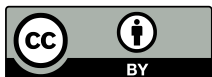

© 2018 by the authors. Submitted for possible open access publication under the terms and conditions of the Creative Commons Attribution (CC BY) license (<http://creativecommons.org/licenses/by/4.0/>).
